# Supplementary material
Source: publisher figshare collection journal article supplement (https://acs.figshare.com/ndownloader/files/5198566)
Supplement: Supplementary file 1 [file 5198566]

# Multivalent Poly(ethylene glycol)-Containing Conjugates for *In Vivo* Antibody Suppression (Supporting Information)

*David S. Jones<sup>\*</sup>, Michael J. Branks, Mary-Ann Campbell, Keith A. Cockerill, Jeffrey R.  
Hammaker, Christina A. Kessler, Eric M. Smith, Anping Tao, Huong-Thu Ton-Nu, Tong  
Xu*

La Jolla Pharmaceutical Company, 6455 Nancy Ridge Drive, San Diego, CA 92121

dave.jones@ljpc.com

## CONTENTS

Characterization of conjugates and estimates of purity.

---

<sup>\*</sup> To whom correspondence should be addressed. Tel.: (858) 646-6628. Fax: (858) 626  
2845. E-mail: dave.jones@ljpc.com.

The purities of the conjugates were determined using analytical HPLC using a weak cation exchange column. The domain 1 polypeptide has an isoelectric point greater than 9, and cation exchange was the only method tried which satisfactorily resolved the multivalent PEG conjugates from other products of the conjugation reaction. By-products included conjugates with lower substitution such as conjugates with only three, two, or one polypeptides attached. Leftover TA/D1 was also included in the mixture, as were other minor impurities. The purity of conjugates is not expected to significantly influence the ability to suppress antibody. Typical purity of TA/D1 used in preparing the conjugates was 83-90% as determined by reverse phase HPLC. Domain 1 polypeptide of 16 additional mass units, due to oxidation of methionine to methioninesulfoxide, accounted for 5-10% of the material. The remaining 5-7% of the material was unidentified. Some of the impurities are undoubtedly carried through the preparation of the conjugates. The purities and mass spectral data of the conjugates are presented in Table 1. Purities are defined as the percentage of total area associated with tetravalent conjugates eluting from an analytical weak cation exchange HPLC column.

Table 1. Purities and Mass Spectral Data of Conjugates

| Compound             | HPLC purity                                 |              |                     | MALDI mass spec |        |
|----------------------|---------------------------------------------|--------------|---------------------|-----------------|--------|
|                      | method <sup>a</sup> , gradient <sup>b</sup> | elution time | purity <sup>c</sup> | calculated      | found  |
| <u>1a</u> (LJP 1027) | WCX, 0-25 %B                                | 18.2 min     | 98 %                | 29,783          | 29,783 |
|                      | RP, 25-45 %B                                | 16.8 min     | 99 %                |                 |        |
| <u>1b</u> (LJP 1078) | WCX, 0-20 %B                                | 18.3 min     | 99 %                | 34,666          | 35,025 |
| <u>1c</u> (LJP 1081) | WCX, 0-20 %B                                | 16.1 min     | 99 %                | 41,143          | 41,922 |
| <u>1d</u> (LJP 1077) | WCX, 0-20 %B                                | 15.1min      | 96 %                | 51,802          | 51,636 |
| <u>1e</u> (LJP 1086) | WCX, 0-20 %B                                | 13.9 min     | 99 %                | 61,803          | 61,739 |
| <u>1f</u> (LJP 1084) | WCX, 5-25 %B                                | 17.7 min     | 98 %                | 81,638          | 81,893 |
| <u>1g</u> (LJP 1082) | WCX, 0-20 %B                                | 13.4 min     | 98 %                | 50,600          | 51,620 |
| <u>1h</u> (LJP 1083) | WCX, 0-16 %B                                | 13.1 min     | 99 %                | 48,898          | 49,390 |

<sup>a</sup> WCX (weak cation exchange) chromatography was performed on a 4.0 x 250 mm Propac WCX column (Dionex) with a flow rate of 1 mL/min, A buffer = 90/10 10 mM NaH<sub>2</sub>PO<sub>4</sub> pH 7/acetonitrile, B buffer = A + 1 M NaCl; RP (reverse phase) chromatography was performed on a 4.6 x 25 mm diphenyl column (Vydac) with a flow rate of 1 mL/min, A buffer = 0.1 % TFA/water, B buffer = 0.1 % TFA/acetonitrile. <sup>b</sup> Gradients are linear over 20 minutes with beginning and ending percentage of B buffer listed. <sup>c</sup> Percentage of total area associated with tetravalent conjugate.
